# Supplementary material for: Syndecan-1 (CD138) Suppresses Apoptosis in Multiple Myeloma by Activating IGF1 Receptor: Prevention by SynstatinIGF1R Inhibits Tumor Growth
Source: Oxford University Press journal article supplement (doi:10.1158/0008-5472.can-16-0232), 2016-06-30
Supplement: 00085472can160232-sup-161407_1_supp_3476829_g6m9lh.docx [file 00085472can160232-sup-161407_1_supp_3476829_g6m9lh.docx]

**SUPPLEMENTARY MATERIALS**

***Cell attachment assays.*** Nitrocellulose-coated 10-well slides were coated for 2h at 37 OC with 40 µg/mL FN or VN in CMF-PBS. Wells were blocked for 1 h at 37 OC with 1% heat-denatured BSA in CMF-PBS. Cells in plating medium (serum-free medium containing 0.1% heat-denature BSA) were allowed to attach and spread for 2.5 h under normal culture conditions in the presence or absence of inhibitors. Slides were fixed in 4% EM grade paraformaldehyde (Electron Microscopy Sciences) in CMF-PBS, then quenched and blocked as described above and labeled for 30 min in 0.13 µM rhodamine phalloidin (Life Technologies) in CMF-PBS. Coverslips were mounted in Immunomount (Shandon Lipshaw) and allowed to dry. Images were acquired with a Microphot FX microscope (Nikon) using a 20X objective (Nikon; Plan Apo 0.75 NA), Epifluorescence Illuminator (Nikon; Ex 541-551, DM 580, Barrier 590), Photometrix CoolSnap ES camera (Roper Scientific), and version 7.8.1.0 Metamorph software ((MDS Analytical Technologies, Downingtown, PA).

***Receptor expression on primary myeloma cells****.* De-identified bone marrow aspirates containing primary myeloma cells were obtained from the University of Wisconsin Carbone Cancer Center tissue bank. The specimens were from patients with known or suspected plasma cell myeloma and were obtained as part of their routine diagnostic workup. All protocols were approved by the UW Institutional Review Board. No patient health information was stored with these samples. Nitrocellulose-coated wells prepared as described previously ([59](#_ENREF_59)) were incubated with 200 µg/mL of donkey anti-rabbit IgG, then with 20 µg/mL rabbit anti-Sdc1 polyclonal antibody, and blocked for 1 h at 37OC in RPMI 1640 containing 1% heat-denatured BSA (plating medium). Cells were washed in calcium and magnesium-free PBS (CMF-PBS; 135 mM NaCl, 2.7 mM KCl, 10.2 mM Na2HPO4-7H20, and 1.75 mM KH2PO4, pH7.4), counted by trypan blue exclusion, re-suspended in plating medium to yield 20,000 viable cells per well, and panned on the antibody for 2 h at 37OC. Attached cells were rinsed, fixed in 2% paraformaldehyde, and stained for receptor expression.
